# Supplementary material for: Ligand effects, solvent cooperation, and large kinetic solvent deuterium isotope effects in gold(I)-catalyzed intramolecular alkene hydroamination
Source: publisher site journal article supplement (doi:10.3762/bjoc.20.43), 2024-02-29
Supplement: Additional file 2 [file 1860-5397-20-43-S2.pdf]

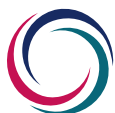

## Supporting Information

for

### **Ligand effects, solvent cooperation, and large kinetic solvent deuterium isotope effects in gold(I)-catalyzed intramolecular alkene hydroamination**

Ruichen Lan, Brock Yager, Yoonsun Jee, Cynthia S. Day and Amanda C. Jones

*Beilstein J. Org. Chem.* **2024**, *20*, 479–496. [doi:10.3762/bjoc.20.43](https://doi.org/10.3762/bjoc.20.43)

## Crystallographic experimental details

## Crystallographic Experimental Details

A specimen of  $C_{41}H_{56}AuCl_2F_6P_2Sb$ , approximate dimensions 0.184 mm x 0.199 mm x 0.309 mm, was used for the X-ray crystallographic analysis. The X-ray intensity data were measured on a Bruker APEX CCD system equipped with a graphite monochromator and a MoK $\alpha$  sealed x-ray tube ( $\lambda = 0.71073 \text{ \AA}$ ).

The frames were integrated with the Bruker SAINT software package using a narrow-frame algorithm. The integration of the data using a monoclinic unit cell yielded a total of 41056 reflections to a maximum  $\theta$  angle of  $30.09^\circ$  ( $0.71 \text{ \AA}$  resolution), of which 12850 were independent (average redundancy 3.195, completeness = 99.8%,  $R_{\text{int}} = 3.58\%$ ,  $R_{\text{sig}} = 3.45\%$ ) and 12250 (95.33%) were greater than  $2\sigma(F^2)$ . The final cell constants of  $a = 13.9857(9) \text{ \AA}$ ,  $b = 10.9855(7) \text{ \AA}$ ,  $c = 15.0464(10) \text{ \AA}$ ,  $\beta = 108.222(1)^\circ$ , volume =  $2195.8(2) \text{ \AA}^3$ , are based upon the refinement of the XYZ-centroids of reflections above  $20 \sigma(I)$ . Data were corrected for absorption effects using the multi-scan method (SADABS). The ratio of minimum to maximum apparent transmission was 0.796. The calculated minimum and maximum transmission coefficients (based on crystal size) are 0.3570 and 0.5120.

The structure was solved and refined using the Bruker SHELXTL Software Package within the APEX3 software suite, using the space group  $Pn$ , with  $Z = 2$  for the formula unit,  $C_{41}H_{56}AuCl_2F_6P_2Sb$ . The final anisotropic full-matrix least-squares refinement on  $F^2$  with 490 variables converged at  $R_1 = 2.56\%$ , for the observed data and  $wR_2 = 6.35\%$  for all data. The goodness-of-fit was 1.027. The largest peak in the final difference electron density synthesis was  $1.533 \text{ e}/\text{\AA}^3$  and the largest hole was  $-1.603 \text{ e}/\text{\AA}^3$  with an RMS deviation of  $0.082 \text{ e}/\text{\AA}^3$ . On the basis of the final model, the calculated density was  $1.686 \text{ g/cm}^3$  and  $F(000)$ , 1100 e-.

Crystal data, data collection and structure refinement details are summarized in tables below.

## Computing details

Data collection: *APEX3* (Bruker, 2017); cell refinement: *SAINT* (Bruker, 2014); data reduction: *SAINT* (Bruker, 2014); absorption correction: *SADABS* (Krause, 2015); program(s) used to solve structure: *SHELXT* (Sheldrick, 2015a); program(s) used to refine structure: *SHELXL* (Sheldrick, 2015b); molecular graphics: *XP* in *SHELXTL* (Sheldrick, 2008); software used to prepare material for publication: *SHELXL* (Sheldrick, 2015b) and *publCIF* (Westrip, 2010).

## Acknowledgements

The WFU X-ray Facility thanks the National Science Foundation (grant CHE-0234489) for funds to purchase the X-ray instrument and computers.

## References

- Bruker (2017). *APEX3* (Version 2017.3). Bruker AXS Inc., Madison, WI, USA.
- Bruker (2014). *SAINT* version 8.34A. Bruker AXS Inc., Madison, WI, USA.
- Krause, L., Herbst-Irmer, R., Sheldrick, G. M. & Stalke, D. (2015). *J. Appl. Cryst.* **48**, 3–10.
- Sheldrick, G. M. (2008). *Acta Cryst.* **A64**, 112–122.
- Sheldrick, G. M. (2016). *SHELXL* (Version 2016/6). Bruker AXS Inc., Madison, Wisconsin, USA.
- Sheldrick, G. M. (2015a). *Acta Cryst.* **A71**, 3–8.
- Sheldrick, G. M. (2015b). *Acta Cryst.* **C71**, 3–8.
- Westrip, S. P. (2010). *J. Appl. Cryst.* **43**, 920–925.

### Crystal data

|                                |                                                         |
|--------------------------------|---------------------------------------------------------|
| $C_{41}H_{56}AuCl_2F_6P_2Sb$   | $F(000) = 1100$                                         |
| $M_r = 1114.41$                | $D_x = 1.686 \text{ Mg m}^{-3}$                         |
| Monoclinic, $Pn$               | Mo $K\alpha$ radiation, $\lambda = 0.71073 \text{ \AA}$ |
| $a = 13.9857 (9) \text{ \AA}$  | Cell parameters from 9780 reflections                   |
| $b = 10.9855 (7) \text{ \AA}$  | $\theta = 3.5\text{--}30.0^\circ$                       |
| $c = 15.0464 (10) \text{ \AA}$ | $\mu = 4.20 \text{ mm}^{-1}$                            |
| $\beta = 108.222 (1)^\circ$    | $T = 194 \text{ K}$                                     |
| $V = 2195.8 (2) \text{ \AA}^3$ | Block, colourless                                       |
| $Z = 2$                        | $0.31 \times 0.20 \times 0.18 \text{ mm}$               |

### Data collection

|                                                                                                                                                                                                                                                                                                                                                          |                                                                        |
|----------------------------------------------------------------------------------------------------------------------------------------------------------------------------------------------------------------------------------------------------------------------------------------------------------------------------------------------------------|------------------------------------------------------------------------|
| Bruker APEX CCD diffractometer                                                                                                                                                                                                                                                                                                                           | 12850 independent reflections                                          |
| Radiation source: sealed x-ray tube                                                                                                                                                                                                                                                                                                                      | 12250 reflections with $I > 2\sigma(I)$                                |
| Graphite monochromator                                                                                                                                                                                                                                                                                                                                   | $R_{\text{int}} = 0.036$                                               |
| $\phi$ and $\omega$ scans                                                                                                                                                                                                                                                                                                                                | $\theta_{\text{max}} = 30.1^\circ$ , $\theta_{\text{min}} = 3.5^\circ$ |
| Absorption correction: multi-scan<br>Data were corrected for scaling and absorption effects using the multi-scan technique (SADABS). The ratio of minimum to maximum apparent transmission was 0.796. The calculated minimum and maximum transmission coefficients (based on crystal size) are 0.357 and 0.512.<br>(SADABS; Krause <i>et al.</i> , 2015) | $h = -19 \rightarrow 19$                                               |
| $T_{\text{min}} = 0.594$ , $T_{\text{max}} = 0.746$                                                                                                                                                                                                                                                                                                      | $k = -15 \rightarrow 15$                                               |
| 41056 measured reflections                                                                                                                                                                                                                                                                                                                               | $l = -21 \rightarrow 21$                                               |

### Refinement

|                                 |                                                                                     |
|---------------------------------|-------------------------------------------------------------------------------------|
| Refinement on $F^2$             | Secondary atom site location: difference Fourier map                                |
| Least-squares matrix: full      | Hydrogen site location: inferred from neighbouring sites                            |
| $R[F^2 > 2\sigma(F^2)] = 0.026$ | H-atom parameters constrained                                                       |
| $wR(F^2) = 0.064$               | $w = 1/[\sigma^2(F_o^2) + (0.0343P)^2 + 1.0791P]$<br>where $P = (F_o^2 + 2F_c^2)/3$ |
| $S = 1.03$                      | $(\Delta/\sigma)_{\text{max}} = 0.001$                                              |
| 12850 reflections               | $\Delta_{\text{max}} = 1.53 \text{ e \AA}^{-3}$                                     |

|                                                                |                                                                                                                                                                                                                                                                                                                             |
|----------------------------------------------------------------|-----------------------------------------------------------------------------------------------------------------------------------------------------------------------------------------------------------------------------------------------------------------------------------------------------------------------------|
| 490 parameters                                                 | $\Delta_{\min} = -1.60 \text{ e } \text{\AA}^{-3}$                                                                                                                                                                                                                                                                          |
| 2 restraints                                                   | Absolute structure: Flack x determined using 5795 quotients [(I+)-(I-)]/[(I+)+(I-)] (Parsons, Flack and Wagner, Acta Cryst. B69 (2013) 249-259).<br>Flack -0.010(3); Number Bijvoet Pairs = 6392 (99%), 5848 Selected for: Parsons -0.010(2) # P2(tr) 1.000, P3(tr) 1.000, P3(tw) 0.000, Student-T Nu = 28, Hooft -0.012(1) |
| Primary atom site location: structure-invariant direct methods | Absolute structure parameter: -0.010 (3)                                                                                                                                                                                                                                                                                    |

### Special details

*Geometry.* All esds (except the esd in the dihedral angle between two l.s. planes) are estimated using the full covariance matrix. The cell esds are taken into account individually in the estimation of esds in distances, angles and torsion angles; correlations between esds in cell parameters are only used when they are defined by crystal symmetry. An approximate (isotropic) treatment of cell esds is used for estimating esds involving l.s. planes.

### Fractional atomic coordinates and isotropic or equivalent isotropic displacement parameters ( $\text{\AA}^2$ )

|     | <i>x</i>    | <i>y</i>     | <i>z</i>    | $U_{\text{iso}}^*/U_{\text{eq}}$ |
|-----|-------------|--------------|-------------|----------------------------------|
| Au1 | 0.21164 (2) | 0.35458 (2)  | 0.47770 (2) | 0.02118 (4)                      |
| P1  | 0.30025 (8) | 0.43939 (10) | 0.38145 (8) | 0.0210 (2)                       |
| P2  | 0.17544 (9) | 0.25062 (11) | 0.60147 (8) | 0.0219 (2)                       |
| C1  | 0.2711 (4)  | 0.5923 (4)   | 0.3312 (4)  | 0.0277 (9)                       |
| C2  | 0.2140 (5)  | 0.6799 (5)   | 0.3598 (5)  | 0.0375 (12)                      |
| C3  | 0.2090 (7)  | 0.7985 (6)   | 0.3222 (7)  | 0.065 (2)                        |
| H3  | 0.172530    | 0.859381     | 0.342785    | 0.078*                           |
| C4  | 0.2550 (8)  | 0.8284 (7)   | 0.2571 (8)  | 0.069 (3)                        |
| H4  | 0.249339    | 0.908764     | 0.232732    | 0.083*                           |
| C5  | 0.3086 (6)  | 0.7437 (6)   | 0.2274 (6)  | 0.0505 (16)                      |
| H5  | 0.339539    | 0.763388     | 0.181350    | 0.061*                           |
| C6  | 0.3174 (5)  | 0.6278 (5)   | 0.2656 (5)  | 0.0387 (12)                      |
| H6  | 0.356976    | 0.569650     | 0.246022    | 0.046*                           |
| C7  | 0.1510 (5)  | 0.6620 (5)   | 0.4222 (5)  | 0.0403 (13)                      |
| C8  | 0.0640 (5)  | 0.5923 (6)   | 0.3934 (6)  | 0.0472 (15)                      |
| H8  | 0.053022    | 0.540620     | 0.340447    | 0.057*                           |
| C9  | -0.0074 (7) | 0.5961 (8)   | 0.4400 (8)  | 0.066 (2)                        |
| H9  | -0.067027   | 0.548746     | 0.418669    | 0.079*                           |
| C10 | 0.0095 (9)  | 0.6699 (9)   | 0.5178 (9)  | 0.079 (3)                        |

|      |             |             |            |             |
|------|-------------|-------------|------------|-------------|
| H10  | -0.039545   | 0.675045    | 0.549306   | 0.094*      |
| C11  | 0.0960 (11) | 0.7349 (9)  | 0.5493 (8) | 0.085 (3)   |
| H11  | 0.108058    | 0.782587    | 0.604391   | 0.102*      |
| C12  | 0.1675 (7)  | 0.7328 (6)  | 0.5023 (6) | 0.061 (2)   |
| H12  | 0.227331    | 0.779663    | 0.524903   | 0.073*      |
| C13  | 0.2855 (4)  | 0.3330 (5)  | 0.2792 (4) | 0.0271 (10) |
| C14  | 0.3725 (5)  | 0.3251 (6)  | 0.2370 (5) | 0.0391 (12) |
| H14A | 0.352994    | 0.271723    | 0.182076   | 0.059*      |
| H14B | 0.432396    | 0.291971    | 0.283764   | 0.059*      |
| H14C | 0.387493    | 0.406579    | 0.218378   | 0.059*      |
| C15  | 0.2694 (5)  | 0.2042 (5)  | 0.3104 (4) | 0.0344 (11) |
| H15A | 0.258618    | 0.148014    | 0.257608   | 0.052*      |
| H15B | 0.210284    | 0.203269    | 0.332237   | 0.052*      |
| H15C | 0.328894    | 0.178832    | 0.361439   | 0.052*      |
| C16  | 0.1884 (5)  | 0.3745 (6)  | 0.2033 (4) | 0.0374 (12) |
| H16A | 0.166475    | 0.311056    | 0.155439   | 0.056*      |
| H16B | 0.201612    | 0.449893    | 0.174316   | 0.056*      |
| H16C | 0.135391    | 0.388967    | 0.231981   | 0.056*      |
| C17  | 0.4341 (3)  | 0.4542 (4)  | 0.4589 (4) | 0.0269 (9)  |
| C18  | 0.5068 (4)  | 0.5183 (6)  | 0.4155 (5) | 0.0385 (12) |
| H18A | 0.574758    | 0.518538    | 0.460572   | 0.058*      |
| H18B | 0.484471    | 0.602363    | 0.399509   | 0.058*      |
| H18C | 0.507366    | 0.474915    | 0.358778   | 0.058*      |
| C19  | 0.4295 (4)  | 0.5312 (6)  | 0.5433 (4) | 0.0414 (13) |
| H19A | 0.496946    | 0.536824    | 0.589061   | 0.062*      |
| H19B | 0.383662    | 0.492654    | 0.572532   | 0.062*      |
| H19C | 0.405059    | 0.613096    | 0.521981   | 0.062*      |
| C20  | 0.4760 (4)  | 0.3278 (6)  | 0.4922 (4) | 0.0360 (11) |
| H20A | 0.540020    | 0.336002    | 0.542629   | 0.054*      |
| H20B | 0.486947    | 0.282972    | 0.439923   | 0.054*      |
| H20C | 0.427849    | 0.283393    | 0.515428   | 0.054*      |
| C21  | 0.0632 (4)  | 0.1549 (4)  | 0.5815 (3) | 0.0236 (8)  |
| C22  | 0.0036 (3)  | 0.1114 (4)  | 0.4936 (3) | 0.0232 (8)  |
| C23  | -0.0718 (4) | 0.0247 (5)  | 0.4891 (4) | 0.0320 (10) |
| H23  | -0.110803   | -0.006125   | 0.429903   | 0.038*      |
| C24  | -0.0907 (4) | -0.0166 (5) | 0.5688 (4) | 0.0342 (11) |
| H24  | -0.142162   | -0.074991   | 0.563973   | 0.041*      |

|      |             |            |            |             |
|------|-------------|------------|------------|-------------|
| C25  | -0.0347 (4) | 0.0269 (5) | 0.6554 (4) | 0.0333 (10) |
| H25  | -0.047869   | -0.000056  | 0.710400   | 0.040*      |
| C26  | 0.0416 (4)  | 0.1112 (5) | 0.6611 (3) | 0.0303 (10) |
| H26  | 0.080537    | 0.140111   | 0.720966   | 0.036*      |
| C27  | 0.0092 (4)  | 0.1517 (4) | 0.4008 (3) | 0.0242 (9)  |
| C28  | 0.0340 (4)  | 0.0689 (5) | 0.3417 (4) | 0.0316 (10) |
| H28  | 0.059264    | -0.008916  | 0.365096   | 0.038*      |
| C29  | 0.0227 (4)  | 0.0977 (6) | 0.2493 (4) | 0.0361 (11) |
| H29  | 0.042307    | 0.041044   | 0.210561   | 0.043*      |
| C30  | -0.0171 (5) | 0.2091 (6) | 0.2139 (4) | 0.0390 (13) |
| H30  | -0.028408   | 0.227752   | 0.149818   | 0.047*      |
| C31  | -0.0399 (5) | 0.2917 (6) | 0.2712 (5) | 0.0471 (15) |
| H31  | -0.065342   | 0.369162   | 0.246879   | 0.056*      |
| C32  | -0.0270 (5) | 0.2657 (5) | 0.3650 (4) | 0.0359 (11) |
| H32  | -0.042696   | 0.325127   | 0.404153   | 0.043*      |
| C33  | 0.1717 (5)  | 0.3670 (5) | 0.6934 (4) | 0.0315 (12) |
| C34  | 0.2406 (5)  | 0.4727 (6) | 0.6854 (5) | 0.0419 (13) |
| H34A | 0.240986    | 0.534924   | 0.732204   | 0.063*      |
| H34B | 0.215528    | 0.508388   | 0.622668   | 0.063*      |
| H34C | 0.309119    | 0.442201   | 0.696233   | 0.063*      |
| C35  | 0.0633 (5)  | 0.4133 (6) | 0.6677 (5) | 0.0442 (14) |
| H35A | 0.061275    | 0.487393   | 0.703303   | 0.066*      |
| H35B | 0.020814    | 0.350708   | 0.682748   | 0.066*      |
| H35C | 0.038316    | 0.431293   | 0.600588   | 0.066*      |
| C36  | 0.2072 (5)  | 0.3252 (7) | 0.7964 (4) | 0.0443 (14) |
| H36A | 0.209910    | 0.395371   | 0.837294   | 0.066*      |
| H36B | 0.274260    | 0.288687   | 0.811079   | 0.066*      |
| H36C | 0.159859    | 0.264807   | 0.806233   | 0.066*      |
| C37  | 0.2817 (4)  | 0.1374 (4) | 0.6458 (4) | 0.0291 (10) |
| C38  | 0.3810 (4)  | 0.2055 (6) | 0.6869 (5) | 0.0401 (13) |
| H38A | 0.437268    | 0.148863   | 0.695600   | 0.060*      |
| H38B | 0.383438    | 0.240706   | 0.747461   | 0.060*      |
| H38C | 0.385849    | 0.270721   | 0.644106   | 0.060*      |
| C39  | 0.2832 (4)  | 0.0640 (5) | 0.5589 (4) | 0.0348 (11) |
| H39A | 0.333731    | -0.000729  | 0.577757   | 0.052*      |
| H39B | 0.299992    | 0.118203   | 0.514238   | 0.052*      |
| H39C | 0.216717    | 0.027810   | 0.529421   | 0.052*      |

|      |             |              |             |              |
|------|-------------|--------------|-------------|--------------|
| C40  | 0.2677 (5)  | 0.0464 (6)   | 0.7193 (5)  | 0.0419 (13)  |
| H40A | 0.326644    | -0.006904    | 0.740259    | 0.063*       |
| H40B | 0.207315    | -0.002842    | 0.691294    | 0.063*       |
| H40C | 0.260133    | 0.091430     | 0.772982    | 0.063*       |
| Sb1  | 0.57627 (4) | -0.06445 (4) | 0.46314 (3) | 0.04642 (11) |
| F1   | 0.6766 (4)  | -0.0229 (6)  | 0.4092 (4)  | 0.0787 (15)  |
| F2   | 0.5277 (5)  | -0.1752 (5)  | 0.3660 (4)  | 0.0697 (14)  |
| F3   | 0.4920 (6)  | 0.0509 (6)   | 0.3880 (5)  | 0.096 (2)    |
| F4   | 0.4783 (7)  | -0.1150 (10) | 0.5135 (6)  | 0.129 (3)    |
| F5   | 0.6263 (10) | 0.0514 (10)  | 0.5549 (6)  | 0.173 (5)    |
| F6   | 0.6639 (7)  | -0.1780 (11) | 0.5341 (8)  | 0.172 (5)    |
| Cl1  | 0.6733 (3)  | 0.2696 (3)   | 0.3297 (2)  | 0.0899 (8)   |
| Cl2  | 0.7881 (2)  | 0.4015 (3)   | 0.4955 (2)  | 0.0857 (7)   |
| C41  | 0.7333 (7)  | 0.2609 (9)   | 0.4508 (8)  | 0.074 (3)    |
| H41A | 0.786096    | 0.197402     | 0.464112    | 0.089*       |
| H41B | 0.683624    | 0.237397     | 0.482284    | 0.089*       |

*Atomic displacement parameters ( $\text{\AA}^2$ )*

|     | $U^{11}$    | $U^{22}$    | $U^{33}$    | $U^{12}$    | $U^{13}$    | $U^{23}$     |
|-----|-------------|-------------|-------------|-------------|-------------|--------------|
| Au1 | 0.02046 (6) | 0.02158 (7) | 0.02277 (7) | 0.00012 (8) | 0.00856 (5) | -0.00092 (7) |
| P1  | 0.0208 (5)  | 0.0190 (5)  | 0.0252 (5)  | -0.0007 (4) | 0.0098 (4)  | -0.0020 (4)  |
| P2  | 0.0212 (5)  | 0.0246 (5)  | 0.0205 (5)  | -0.0017 (4) | 0.0073 (4)  | -0.0015 (4)  |
| C1  | 0.027 (2)   | 0.020 (2)   | 0.035 (2)   | 0.0001 (17) | 0.0094 (19) | 0.0042 (18)  |
| C2  | 0.038 (3)   | 0.027 (2)   | 0.053 (3)   | 0.009 (2)   | 0.023 (3)   | 0.008 (2)    |
| C3  | 0.083 (6)   | 0.033 (3)   | 0.097 (6)   | 0.027 (3)   | 0.052 (5)   | 0.023 (4)    |
| C4  | 0.085 (6)   | 0.037 (3)   | 0.101 (7)   | 0.020 (4)   | 0.052 (6)   | 0.035 (4)    |
| C5  | 0.055 (4)   | 0.042 (3)   | 0.061 (4)   | -0.003 (3)  | 0.028 (3)   | 0.017 (3)    |
| C6  | 0.044 (3)   | 0.032 (3)   | 0.046 (3)   | 0.002 (2)   | 0.022 (3)   | 0.008 (2)    |
| C7  | 0.045 (3)   | 0.029 (3)   | 0.054 (4)   | 0.014 (2)   | 0.026 (3)   | 0.007 (2)    |
| C8  | 0.039 (3)   | 0.041 (3)   | 0.067 (4)   | 0.014 (3)   | 0.025 (3)   | 0.016 (3)    |
| C9  | 0.059 (5)   | 0.056 (4)   | 0.102 (7)   | 0.023 (4)   | 0.054 (5)   | 0.031 (5)    |
| C10 | 0.097 (8)   | 0.058 (5)   | 0.114 (8)   | 0.038 (5)   | 0.081 (7)   | 0.027 (5)    |
| C11 | 0.141 (10)  | 0.053 (5)   | 0.087 (7)   | 0.031 (6)   | 0.074 (7)   | -0.003 (5)   |
| C12 | 0.089 (6)   | 0.029 (3)   | 0.078 (5)   | 0.008 (3)   | 0.047 (5)   | 0.001 (3)    |
| C13 | 0.029 (3)   | 0.029 (2)   | 0.025 (2)   | -0.003 (2)  | 0.012 (2)   | -0.0062 (19) |
| C14 | 0.041 (3)   | 0.038 (3)   | 0.048 (3)   | -0.006 (2)  | 0.028 (3)   | -0.011 (2)   |



|     |             |             |              |              |              |              |
|-----|-------------|-------------|--------------|--------------|--------------|--------------|
| C15 | 0.044 (3)   | 0.024 (2)   | 0.040 (3)    | -0.010 (2)   | 0.021 (2)    | -0.012 (2)   |
| C16 | 0.037 (3)   | 0.044 (3)   | 0.027 (2)    | -0.006 (2)   | 0.005 (2)    | -0.005 (2)   |
| C17 | 0.0209 (19) | 0.028 (2)   | 0.031 (2)    | -0.0026 (17) | 0.0083 (17)  | -0.0049 (18) |
| C18 | 0.028 (2)   | 0.042 (3)   | 0.049 (3)    | -0.009 (2)   | 0.017 (2)    | -0.003 (2)   |
| C19 | 0.030 (3)   | 0.047 (3)   | 0.041 (3)    | -0.007 (2)   | 0.003 (2)    | -0.017 (3)   |
| C20 | 0.029 (2)   | 0.038 (3)   | 0.041 (3)    | 0.000 (2)    | 0.010 (2)    | -0.001 (2)   |
| C21 | 0.022 (2)   | 0.025 (2)   | 0.026 (2)    | -0.0004 (15) | 0.0097 (17)  | -0.0005 (16) |
| C22 | 0.0229 (19) | 0.025 (2)   | 0.0216 (19)  | 0.0014 (16)  | 0.0068 (16)  | -0.0003 (16) |
| C23 | 0.032 (2)   | 0.032 (2)   | 0.026 (2)    | -0.007 (2)   | 0.002 (2)    | -0.0014 (19) |
| C24 | 0.031 (2)   | 0.031 (2)   | 0.041 (3)    | -0.010 (2)   | 0.011 (2)    | -0.001 (2)   |
| C25 | 0.036 (3)   | 0.038 (3)   | 0.030 (2)    | -0.003 (2)   | 0.017 (2)    | 0.004 (2)    |
| C26 | 0.032 (2)   | 0.038 (2)   | 0.023 (2)    | -0.006 (2)   | 0.0107 (19)  | -0.0019 (19) |
| C27 | 0.0203 (19) | 0.029 (2)   | 0.022 (2)    | -0.0018 (16) | 0.0041 (16)  | 0.0017 (16)  |
| C28 | 0.034 (2)   | 0.034 (2)   | 0.027 (2)    | 0.000 (2)    | 0.0104 (19)  | -0.0013 (19) |
| C29 | 0.040 (3)   | 0.043 (3)   | 0.029 (2)    | -0.014 (2)   | 0.015 (2)    | -0.009 (2)   |
| C30 | 0.040 (3)   | 0.051 (3)   | 0.023 (2)    | -0.015 (3)   | 0.004 (2)    | 0.002 (2)    |
| C31 | 0.056 (4)   | 0.043 (3)   | 0.038 (3)    | 0.008 (3)    | 0.009 (3)    | 0.016 (3)    |
| C32 | 0.044 (3)   | 0.031 (3)   | 0.034 (3)    | 0.008 (2)    | 0.014 (2)    | 0.005 (2)    |
| C33 | 0.035 (3)   | 0.034 (3)   | 0.030 (3)    | -0.008 (2)   | 0.016 (2)    | -0.012 (2)   |
| C34 | 0.054 (3)   | 0.036 (3)   | 0.045 (3)    | -0.014 (3)   | 0.029 (3)    | -0.017 (2)   |
| C35 | 0.048 (3)   | 0.040 (3)   | 0.053 (4)    | 0.002 (3)    | 0.029 (3)    | -0.014 (3)   |
| C36 | 0.050 (3)   | 0.058 (4)   | 0.026 (2)    | -0.016 (3)   | 0.014 (2)    | -0.011 (2)   |
| C37 | 0.026 (2)   | 0.030 (2)   | 0.029 (2)    | 0.0051 (17)  | 0.0057 (19)  | 0.0083 (18)  |
| C38 | 0.027 (2)   | 0.046 (3)   | 0.042 (3)    | -0.001 (2)   | 0.004 (2)    | 0.004 (2)    |
| C39 | 0.035 (3)   | 0.031 (3)   | 0.041 (3)    | 0.010 (2)    | 0.014 (2)    | 0.002 (2)    |
| C40 | 0.037 (3)   | 0.047 (3)   | 0.040 (3)    | 0.007 (2)    | 0.010 (2)    | 0.018 (3)    |
| Sb1 | 0.0578 (3)  | 0.0511 (2)  | 0.02958 (18) | -0.0051 (2)  | 0.01254 (17) | 0.00285 (17) |
| F1  | 0.064 (3)   | 0.092 (4)   | 0.088 (4)    | -0.023 (3)   | 0.034 (3)    | 0.010 (3)    |
| F2  | 0.094 (4)   | 0.056 (3)   | 0.070 (3)    | -0.024 (3)   | 0.040 (3)    | -0.021 (2)   |
| F3  | 0.112 (5)   | 0.077 (4)   | 0.103 (5)    | 0.054 (4)    | 0.039 (4)    | 0.018 (3)    |
| F4  | 0.134 (7)   | 0.202 (8)   | 0.088 (5)    | -0.035 (6)   | 0.088 (5)    | -0.004 (5)   |
| F5  | 0.242 (12)  | 0.193 (11)  | 0.073 (5)    | -0.076 (9)   | 0.036 (6)    | -0.080 (6)   |
| F6  | 0.117 (7)   | 0.208 (9)   | 0.163 (9)    | 0.029 (6)    | 0.003 (6)    | 0.151 (8)    |
| Cl1 | 0.113 (2)   | 0.0731 (15) | 0.0934 (18)  | 0.0028 (14)  | 0.0457 (16)  | 0.0277 (14)  |
| Cl2 | 0.0645 (13) | 0.0943 (17) | 0.0992 (19)  | 0.0009 (13)  | 0.0269 (13)  | 0.0250 (16)  |
| C41 | 0.061 (5)   | 0.072 (6)   | 0.101 (7)    | 0.024 (4)    | 0.043 (5)    | 0.040 (5)    |

*Geometric parameters (Å, °)*

|          |             |          |            |
|----------|-------------|----------|------------|
| Au1—P2   | 2.3703 (12) | C21—C22  | 1.408 (6)  |
| Au1—P1   | 2.3715 (12) | C22—C23  | 1.408 (7)  |
| P1—C1    | 1.835 (5)   | C22—C27  | 1.490 (7)  |
| P1—C17   | 1.878 (5)   | C23—C24  | 1.383 (8)  |
| P1—C13   | 1.892 (5)   | C23—H23  | 0.9500     |
| P2—C21   | 1.835 (5)   | C24—C25  | 1.378 (8)  |
| P2—C37   | 1.892 (5)   | C24—H24  | 0.9500     |
| P2—C33   | 1.897 (5)   | C25—C26  | 1.394 (7)  |
| C1—C6    | 1.396 (8)   | C25—H25  | 0.9500     |
| C1—C2    | 1.401 (7)   | C26—H26  | 0.9500     |
| C2—C3    | 1.412 (9)   | C27—C28  | 1.389 (7)  |
| C2—C7    | 1.488 (9)   | C27—C32  | 1.394 (7)  |
| C3—C4    | 1.370 (12)  | C28—C29  | 1.385 (7)  |
| C3—H3    | 0.9500      | C28—H28  | 0.9500     |
| C4—C5    | 1.355 (12)  | C29—C30  | 1.380 (10) |
| C4—H4    | 0.9500      | C29—H29  | 0.9500     |
| C5—C6    | 1.386 (8)   | C30—C31  | 1.357 (10) |
| C5—H5    | 0.9500      | C30—H30  | 0.9500     |
| C6—H6    | 0.9500      | C31—C32  | 1.395 (8)  |
| C7—C8    | 1.388 (10)  | C31—H31  | 0.9500     |
| C7—C12   | 1.392 (11)  | C32—H32  | 0.9500     |
| C8—C9    | 1.389 (10)  | C33—C35  | 1.529 (9)  |
| C8—H8    | 0.9500      | C33—C34  | 1.537 (8)  |
| C9—C10   | 1.382 (16)  | C33—C36  | 1.542 (9)  |
| C9—H9    | 0.9500      | C34—H34A | 0.9800     |
| C10—C11  | 1.356 (17)  | C34—H34B | 0.9800     |
| C10—H10  | 0.9500      | C34—H34C | 0.9800     |
| C11—C12  | 1.394 (13)  | C35—H35A | 0.9800     |
| C11—H11  | 0.9500      | C35—H35B | 0.9800     |
| C12—H12  | 0.9500      | C35—H35C | 0.9800     |
| C13—C15  | 1.530 (8)   | C36—H36A | 0.9800     |
| C13—C14  | 1.541 (8)   | C36—H36B | 0.9800     |
| C13—C16  | 1.545 (8)   | C36—H36C | 0.9800     |
| C14—H14A | 0.9800      | C37—C38  | 1.528 (8)  |
| C14—H14B | 0.9800      | C37—C39  | 1.542 (8)  |
| C14—H14C | 0.9800      | C37—C40  | 1.548 (8)  |

|            |             |             |            |
|------------|-------------|-------------|------------|
| C15—H15A   | 0.9800      | C38—H38A    | 0.9800     |
| C15—H15B   | 0.9800      | C38—H38B    | 0.9800     |
| C15—H15C   | 0.9800      | C38—H38C    | 0.9800     |
| C16—H16A   | 0.9800      | C39—H39A    | 0.9800     |
| C16—H16B   | 0.9800      | C39—H39B    | 0.9800     |
| C16—H16C   | 0.9800      | C39—H39C    | 0.9800     |
| C17—C20    | 1.529 (8)   | C40—H40A    | 0.9800     |
| C17—C18    | 1.540 (7)   | C40—H40B    | 0.9800     |
| C17—C19    | 1.544 (8)   | C40—H40C    | 0.9800     |
| C18—H18A   | 0.9800      | Sb1—F6      | 1.839 (7)  |
| C18—H18B   | 0.9800      | Sb1—F4      | 1.846 (6)  |
| C18—H18C   | 0.9800      | Sb1—F5      | 1.847 (7)  |
| C19—H19A   | 0.9800      | Sb1—F3      | 1.855 (6)  |
| C19—H19B   | 0.9800      | Sb1—F2      | 1.859 (5)  |
| C19—H19C   | 0.9800      | Sb1—F1      | 1.883 (5)  |
| C20—H20A   | 0.9800      | C11—C41     | 1.754 (12) |
| C20—H20B   | 0.9800      | C12—C41     | 1.761 (12) |
| C20—H20C   | 0.9800      | C41—H41A    | 0.9900     |
| C21—C26    | 1.408 (7)   | C41—H41B    | 0.9900     |
|            |             |             |            |
| P2—Au1—P1  | 161.79 (4)  | C23—C22—C27 | 114.5 (4)  |
| C1—P1—C17  | 103.1 (2)   | C21—C22—C27 | 126.2 (4)  |
| C1—P1—C13  | 106.1 (3)   | C24—C23—C22 | 121.6 (5)  |
| C17—P1—C13 | 113.1 (2)   | C24—C23—H23 | 119.2      |
| C1—P1—Au1  | 121.34 (17) | C22—C23—H23 | 119.2      |
| C17—P1—Au1 | 105.36 (16) | C25—C24—C23 | 120.0 (5)  |
| C13—P1—Au1 | 108.01 (17) | C25—C24—H24 | 120.0      |
| C21—P2—C37 | 102.6 (2)   | C23—C24—H24 | 120.0      |
| C21—P2—C33 | 106.8 (2)   | C24—C25—C26 | 119.1 (5)  |
| C37—P2—C33 | 112.6 (3)   | C24—C25—H25 | 120.5      |
| C21—P2—Au1 | 121.98 (16) | C26—C25—H25 | 120.5      |
| C37—P2—Au1 | 104.87 (17) | C25—C26—C21 | 122.5 (5)  |
| C33—P2—Au1 | 108.03 (19) | C25—C26—H26 | 118.7      |
| C6—C1—C2   | 117.4 (5)   | C21—C26—H26 | 118.7      |
| C6—C1—P1   | 117.1 (4)   | C28—C27—C32 | 118.3 (5)  |
| C2—C1—P1   | 125.2 (4)   | C28—C27—C22 | 120.1 (4)  |
| C1—C2—C3   | 118.2 (6)   | C32—C27—C22 | 120.6 (5)  |

|             |           |               |           |
|-------------|-----------|---------------|-----------|
| C1—C2—C7    | 127.5 (5) | C29—C28—C27   | 121.3 (5) |
| C3—C2—C7    | 114.2 (5) | C29—C28—H28   | 119.3     |
| C4—C3—C2    | 122.1 (7) | C27—C28—H28   | 119.3     |
| C4—C3—H3    | 118.9     | C30—C29—C28   | 119.7 (5) |
| C2—C3—H3    | 118.9     | C30—C29—H29   | 120.2     |
| C5—C4—C3    | 120.2 (6) | C28—C29—H29   | 120.2     |
| C5—C4—H4    | 119.9     | C31—C30—C29   | 119.7 (5) |
| C3—C4—H4    | 119.9     | C31—C30—H30   | 120.2     |
| C4—C5—C6    | 118.8 (7) | C29—C30—H30   | 120.2     |
| C4—C5—H5    | 120.6     | C30—C31—C32   | 121.6 (6) |
| C6—C5—H5    | 120.6     | C30—C31—H31   | 119.2     |
| C5—C6—C1    | 123.3 (6) | C32—C31—H31   | 119.2     |
| C5—C6—H6    | 118.4     | C27—C32—C31   | 119.4 (6) |
| C1—C6—H6    | 118.4     | C27—C32—H32   | 120.3     |
| C8—C7—C12   | 118.1 (7) | C31—C32—H32   | 120.3     |
| C8—C7—C2    | 120.7 (7) | C35—C33—C34   | 109.0 (5) |
| C12—C7—C2   | 120.1 (7) | C35—C33—C36   | 109.6 (5) |
| C7—C8—C9    | 121.6 (8) | C34—C33—C36   | 106.9 (5) |
| C7—C8—H8    | 119.2     | C35—C33—P2    | 106.9 (4) |
| C9—C8—H8    | 119.2     | C34—C33—P2    | 106.9 (4) |
| C10—C9—C8   | 119.1 (9) | C36—C33—P2    | 117.3 (4) |
| C10—C9—H9   | 120.4     | C33—C34—H34A  | 109.5     |
| C8—C9—H9    | 120.4     | C33—C34—H34B  | 109.5     |
| C11—C10—C9  | 120.2 (8) | H34A—C34—H34B | 109.5     |
| C11—C10—H10 | 119.9     | C33—C34—H34C  | 109.5     |
| C9—C10—H10  | 119.9     | H34A—C34—H34C | 109.5     |
| C10—C11—C12 | 121.1 (9) | H34B—C34—H34C | 109.5     |
| C10—C11—H11 | 119.4     | C33—C35—H35A  | 109.5     |
| C12—C11—H11 | 119.4     | C33—C35—H35B  | 109.5     |
| C7—C12—C11  | 119.8 (9) | H35A—C35—H35B | 109.5     |
| C7—C12—H12  | 120.1     | C33—C35—H35C  | 109.5     |
| C11—C12—H12 | 120.1     | H35A—C35—H35C | 109.5     |
| C15—C13—C14 | 106.6 (5) | H35B—C35—H35C | 109.5     |
| C15—C13—C16 | 108.7 (5) | C33—C36—H36A  | 109.5     |
| C14—C13—C16 | 109.7 (5) | C33—C36—H36B  | 109.5     |
| C15—C13—P1  | 108.1 (4) | H36A—C36—H36B | 109.5     |
| C14—C13—P1  | 118.1 (4) | C33—C36—H36C  | 109.5     |

|               |           |               |           |
|---------------|-----------|---------------|-----------|
| C16—C13—P1    | 105.4 (4) | H36A—C36—H36C | 109.5     |
| C13—C14—H14A  | 109.5     | H36B—C36—H36C | 109.5     |
| C13—C14—H14B  | 109.5     | C38—C37—C39   | 110.4 (5) |
| H14A—C14—H14B | 109.5     | C38—C37—C40   | 109.2 (5) |
| C13—C14—H14C  | 109.5     | C39—C37—C40   | 107.9 (5) |
| H14A—C14—H14C | 109.5     | C38—C37—P2    | 109.5 (4) |
| H14B—C14—H14C | 109.5     | C39—C37—P2    | 105.2 (3) |
| C13—C15—H15A  | 109.5     | C40—C37—P2    | 114.5 (4) |
| C13—C15—H15B  | 109.5     | C37—C38—H38A  | 109.5     |
| H15A—C15—H15B | 109.5     | C37—C38—H38B  | 109.5     |
| C13—C15—H15C  | 109.5     | H38A—C38—H38B | 109.5     |
| H15A—C15—H15C | 109.5     | C37—C38—H38C  | 109.5     |
| H15B—C15—H15C | 109.5     | H38A—C38—H38C | 109.5     |
| C13—C16—H16A  | 109.5     | H38B—C38—H38C | 109.5     |
| C13—C16—H16B  | 109.5     | C37—C39—H39A  | 109.5     |
| H16A—C16—H16B | 109.5     | C37—C39—H39B  | 109.5     |
| C13—C16—H16C  | 109.5     | H39A—C39—H39B | 109.5     |
| H16A—C16—H16C | 109.5     | C37—C39—H39C  | 109.5     |
| H16B—C16—H16C | 109.5     | H39A—C39—H39C | 109.5     |
| C20—C17—C18   | 108.6 (4) | H39B—C39—H39C | 109.5     |
| C20—C17—C19   | 109.8 (5) | C37—C40—H40A  | 109.5     |
| C18—C17—C19   | 107.5 (4) | C37—C40—H40B  | 109.5     |
| C20—C17—P1    | 109.2 (3) | H40A—C40—H40B | 109.5     |
| C18—C17—P1    | 116.0 (4) | C37—C40—H40C  | 109.5     |
| C19—C17—P1    | 105.6 (3) | H40A—C40—H40C | 109.5     |
| C17—C18—H18A  | 109.5     | H40B—C40—H40C | 109.5     |
| C17—C18—H18B  | 109.5     | F6—Sb1—F4     | 90.2 (5)  |
| H18A—C18—H18B | 109.5     | F6—Sb1—F5     | 90.3 (6)  |
| C17—C18—H18C  | 109.5     | F4—Sb1—F5     | 93.2 (5)  |
| H18A—C18—H18C | 109.5     | F6—Sb1—F3     | 177.2 (4) |
| H18B—C18—H18C | 109.5     | F4—Sb1—F3     | 92.5 (4)  |
| C17—C19—H19A  | 109.5     | F5—Sb1—F3     | 90.3 (5)  |
| C17—C19—H19B  | 109.5     | F6—Sb1—F2     | 91.5 (5)  |
| H19A—C19—H19B | 109.5     | F4—Sb1—F2     | 89.4 (3)  |
| C17—C19—H19C  | 109.5     | F5—Sb1—F2     | 176.8 (4) |
| H19A—C19—H19C | 109.5     | F3—Sb1—F2     | 87.8 (3)  |
| H19B—C19—H19C | 109.5     | F6—Sb1—F1     | 87.9 (4)  |

|               |            |                     |            |
|---------------|------------|---------------------|------------|
| C17—C20—H20A  | 109.5      | F4—Sb1—F1           | 176.4 (4)  |
| C17—C20—H20B  | 109.5      | F5—Sb1—F1           | 89.8 (4)   |
| H20A—C20—H20B | 109.5      | F3—Sb1—F1           | 89.4 (3)   |
| C17—C20—H20C  | 109.5      | F2—Sb1—F1           | 87.6 (3)   |
| H20A—C20—H20C | 109.5      | C11—C41—C12         | 111.1 (5)  |
| H20B—C20—H20C | 109.5      | C11—C41—H41A        | 109.4      |
| C26—C21—C22   | 117.5 (4)  | C12—C41—H41A        | 109.4      |
| C26—C21—P2    | 117.2 (4)  | C11—C41—H41B        | 109.4      |
| C22—C21—P2    | 124.9 (4)  | C12—C41—H41B        | 109.4      |
| C23—C22—C21   | 119.2 (4)  | H41A—C41—H41B       | 108.0      |
|               |            |                     |            |
| C17—P1—C1—C6  | 71.1 (5)   | C37—P2—C21—C26      | 71.9 (4)   |
| C13—P1—C1—C6  | -48.0 (5)  | C33—P2—C21—C26      | -46.7 (5)  |
| Au1—P1—C1—C6  | -171.5 (4) | Au1—P2—C21—C26      | -171.4 (3) |
| C17—P1—C1—C2  | -102.5 (5) | C37—P2—C21—C22      | -100.9 (4) |
| C13—P1—C1—C2  | 138.4 (5)  | C33—P2—C21—C22      | 140.5 (4)  |
| Au1—P1—C1—C2  | 14.9 (6)   | Au1—P2—C21—C22      | 15.8 (5)   |
| C6—C1—C2—C3   | -1.4 (10)  | C26—C21—C22—<br>C23 | -1.8 (7)   |
| P1—C1—C2—C3   | 172.1 (6)  | P2—C21—C22—C23      | 170.9 (4)  |
| C6—C1—C2—C7   | 174.5 (7)  | C26—C21—C22—<br>C27 | 175.7 (5)  |
| P1—C1—C2—C7   | -11.9 (9)  | P2—C21—C22—C27      | -11.5 (7)  |
| C1—C2—C3—C4   | 2.3 (14)   | C21—C22—C23—<br>C24 | 1.6 (8)    |
| C7—C2—C3—C4   | -174.2 (9) | C27—C22—C23—<br>C24 | -176.2 (5) |
| C2—C3—C4—C5   | -0.8 (17)  | C22—C23—C24—<br>C25 | -0.2 (9)   |
| C3—C4—C5—C6   | -1.3 (16)  | C23—C24—C25—<br>C26 | -1.0 (9)   |
| C4—C5—C6—C1   | 2.1 (12)   | C24—C25—C26—<br>C21 | 0.8 (9)    |
| C2—C1—C6—C5   | -0.7 (10)  | C22—C21—C26—<br>C25 | 0.7 (8)    |
| P1—C1—C6—C5   | -174.8 (6) | P2—C21—C26—C25      | -172.7 (4) |
| C1—C2—C7—C8   | -67.8 (9)  | C23—C22—C27—<br>C28 | -63.8 (6)  |
| C3—C2—C7—C8   | 108.3 (8)  | C21—C22—C27—<br>C28 | 118.6 (6)  |

|                |            |                 |            |
|----------------|------------|-----------------|------------|
| C1—C2—C7—C12   | 124.4 (7)  | C23—C22—C27—C32 | 104.9 (6)  |
| C3—C2—C7—C12   | -59.5 (9)  | C21—C22—C27—C32 | -72.7 (7)  |
| C12—C7—C8—C9   | 2.8 (10)   | C32—C27—C28—C29 | -0.5 (8)   |
| C2—C7—C8—C9    | -165.2 (6) | C22—C27—C28—C29 | 168.6 (5)  |
| C7—C8—C9—C10   | -1.0 (11)  | C27—C28—C29—C30 | -2.2 (8)   |
| C8—C9—C10—C11  | -1.7 (13)  | C28—C29—C30—C31 | 3.4 (9)    |
| C9—C10—C11—C12 | 2.6 (15)   | C29—C30—C31—C32 | -1.9 (10)  |
| C8—C7—C12—C11  | -1.9 (11)  | C28—C27—C32—C31 | 1.9 (8)    |
| C2—C7—C12—C11  | 166.2 (7)  | C22—C27—C32—C31 | -167.1 (6) |
| C10—C11—C12—C7 | -0.8 (14)  | C30—C31—C32—C27 | -0.7 (10)  |
| C1—P1—C13—C15  | -158.9 (4) | C21—P2—C33—C35  | -43.5 (5)  |
| C17—P1—C13—C15 | 88.8 (4)   | C37—P2—C33—C35  | -155.3 (4) |
| Au1—P1—C13—C15 | -27.4 (4)  | Au1—P2—C33—C35  | 89.3 (4)   |
| C1—P1—C13—C14  | 80.1 (5)   | C21—P2—C33—C34  | -160.1 (4) |
| C17—P1—C13—C14 | -32.2 (5)  | C37—P2—C33—C34  | 88.0 (5)   |
| Au1—P1—C13—C14 | -148.4 (4) | Au1—P2—C33—C34  | -27.3 (5)  |
| C1—P1—C13—C16  | -42.8 (4)  | C21—P2—C33—C36  | 80.0 (5)   |
| C17—P1—C13—C16 | -155.1 (4) | C37—P2—C33—C36  | -31.9 (6)  |
| Au1—P1—C13—C16 | 88.7 (4)   | Au1—P2—C33—C36  | -147.2 (4) |
| C1—P1—C17—C20  | -169.7 (4) | C21—P2—C37—C38  | -167.3 (4) |
| C13—P1—C17—C20 | -55.6 (4)  | C33—P2—C37—C38  | -52.9 (5)  |
| Au1—P1—C17—C20 | 62.2 (4)   | Au1—P2—C37—C38  | 64.4 (4)   |
| C1—P1—C17—C18  | -46.6 (4)  | C21—P2—C37—C39  | 74.1 (4)   |
| C13—P1—C17—C18 | 67.5 (4)   | C33—P2—C37—C39  | -171.5 (4) |
| Au1—P1—C17—C18 | -174.7 (3) | Au1—P2—C37—C39  | -54.3 (4)  |
| C1—P1—C17—C19  | 72.3 (4)   | C21—P2—C37—C40  | -44.2 (5)  |
| C13—P1—C17—C19 | -173.6 (4) | C33—P2—C37—C40  | 70.2 (5)   |
| Au1—P1—C17—C19 | -55.8 (4)  | Au1—P2—C37—C40  | -172.6 (4) |

Least-squares planes (x,y,z in crystal coordinates) and deviations from them

(\* indicates atom used to define plane)

- 1.0309 (0.0220) x + 9.4614 (0.0057) y + 7.5325 (0.0091) z = 6.7256  
(0.0066)

\* 0.0093 (0.0001) Au1

\* -0.0046 (0.0001) P1

\* -0.0046 (0.0000) P2

Rms deviation of fitted atoms = 0.0066

8.6435 (0.0382) x + 3.3304 (0.0216) y + 7.4589 (0.0411) z = 6.8419  
(0.0120)

Angle to previous plane (with approximate esd) = 54.532 ( 0.169 )

\* 0.0618 (0.0036) P1

\* -0.0557 (0.0043) C1

\* -0.0442 (0.0060) C2

\* 0.0271 (0.0072) C3

\* 0.0390 (0.0087) C4

\* -0.0014 (0.0062) C5

\* -0.0267 (0.0055) C6

-0.2686 (0.0082) Au1

Rms deviation of fitted atoms = 0.0411

- 4.1335 (0.0435) x + 8.3880 (0.0253) y - 6.8151 (0.0455) z = 2.0352  
(0.0338)



Angle to previous plane (with approximate esd) = 68.430 ( 0.239 )

\* 0.0160 (0.0047) C7

\* -0.0127 (0.0049) C8

\* -0.0029 (0.0057) C9

\* 0.0153 (0.0066) C10

\* -0.0118 (0.0068) C11

\* -0.0040 (0.0057) C12

Rms deviation of fitted atoms = 0.0117

- 8.8497 (0.0118) x + 8.4717 (0.0073) y + 1.9770 (0.0338) z = 1.8370  
(0.0193)

Angle to previous plane (with approximate esd) = 35.311 ( 0.263 )

\* -0.0774 (0.0025) P2

\* 0.0656 (0.0039) C21

\* 0.0505 (0.0038) C22

\* -0.0248 (0.0039) C23

\* -0.0508 (0.0044) C24

\* -0.0064 (0.0041) C25

\* 0.0432 (0.0043) C26

Rms deviation of fitted atoms = 0.0506

- 13.7578 (0.0086) x - 1.6641 (0.0358) y + 6.0125 (0.0196) z = 1.4317  
(0.0067)

Angle to previous plane (with approximate esd) = 60.076 ( 0.174 )

\* 0.5991 (0.0045) C27

\* 0.0397 (0.0043) C28

\* -0.4080 (0.0046) C29

\* -0.2585 (0.0053) C30

\* 0.2629 (0.0042) C31

\* -0.2351 (0.0018) C33

Rms deviation of fitted atoms = 0.3460

**Figure 1.** shows a perspective drawing of crystalline  $[\text{Au}(\text{P}(\text{C}_4\text{H}_9)_2(\text{C}_{12}\text{H}_9))_2](\text{SbF}_6) \cdot \text{CH}_2\text{Cl}_2$ . P, F and Cl atoms are represented by dotted spheres, Au atoms are represented by cross-hatched spheres, Sb atoms are represented by shaded spheres and carbon and hydrogen atoms are represented by medium and small open spheres, respectively. All nonhydrogen atoms are labeled.

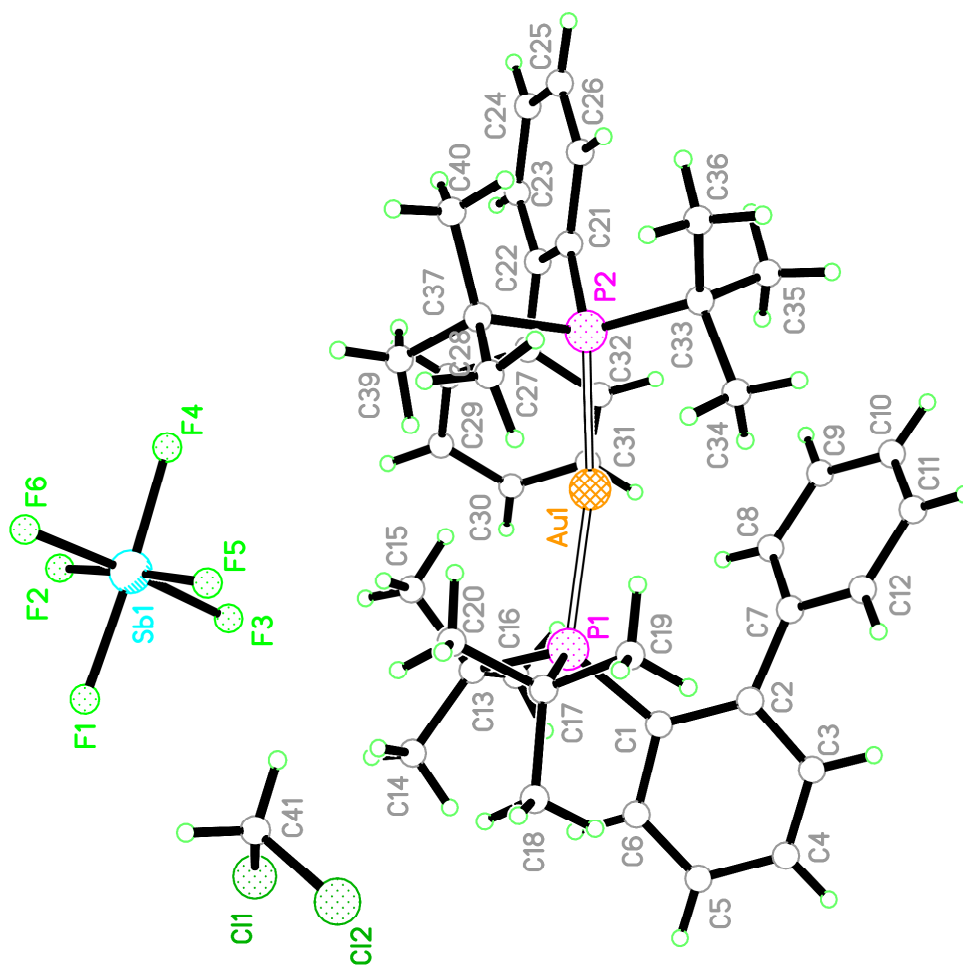

**Figure 2.** shows a perspective drawing of the cation in crystalline  $[\text{Au}(\text{P}(\text{C}_4\text{H}_9)_2(\text{C}_{12}\text{H}_9))_2]^- (\text{SbF}_6) - \text{CH}_2\text{Cl}_2$ . Nonhydrogen atoms are represented by 50% probability ellipsoids. Hydrogen atoms are represented by arbitrarily-small spheres, which are in no way representative of their true thermal motion.

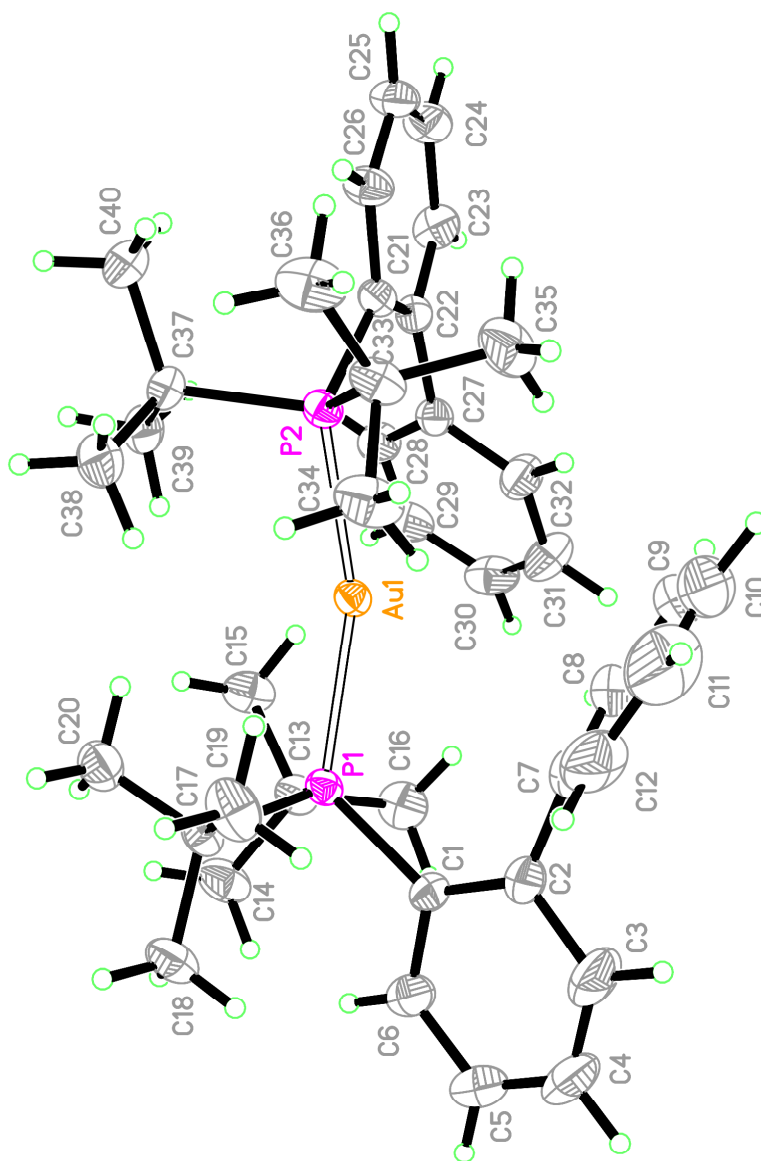

**Figure 3.** shows a perspective drawing of the cation in crystalline  $[\text{Au}(\text{P}(\text{C}_4\text{H}_9)_2(\text{C}_{12}\text{H}_9))_2]^-$  ( $\text{SbF}_6$ ) -  $\text{CH}_2\text{Cl}_2$  with all atoms represented as described in Figure 1.

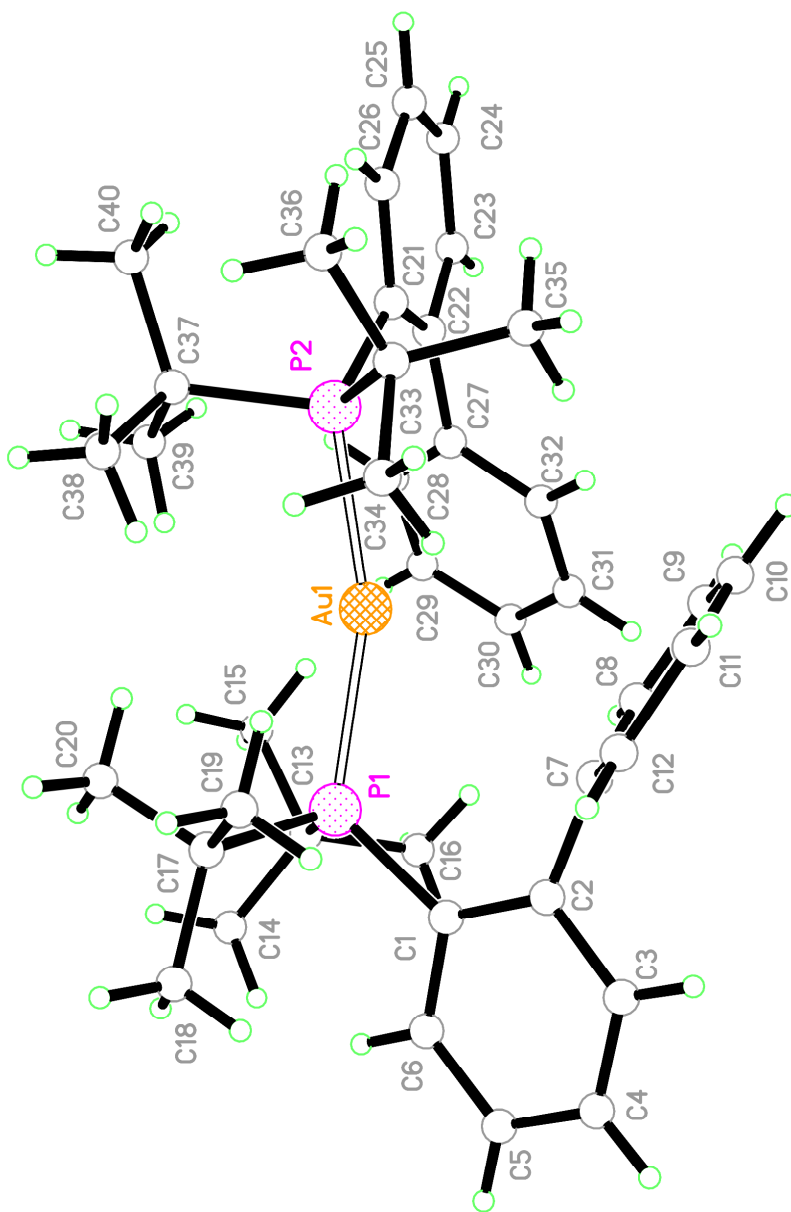

**Figure 4.** shows a perspective drawing of the cation in crystalline  $[\text{Au}(\text{P}(\text{C}_4\text{H}_9)_2(\text{C}_{12}\text{H}_9))_2]^-$ - $(\text{SbF}_6)^-$  -  $\text{CH}_2\text{Cl}_2$  viewed down the  $\text{P}\cdots\text{P}$  vector. Nonhydrogen atoms are represented by 50% probability ellipsoids. Hydrogen atoms have been omitted for clarity.

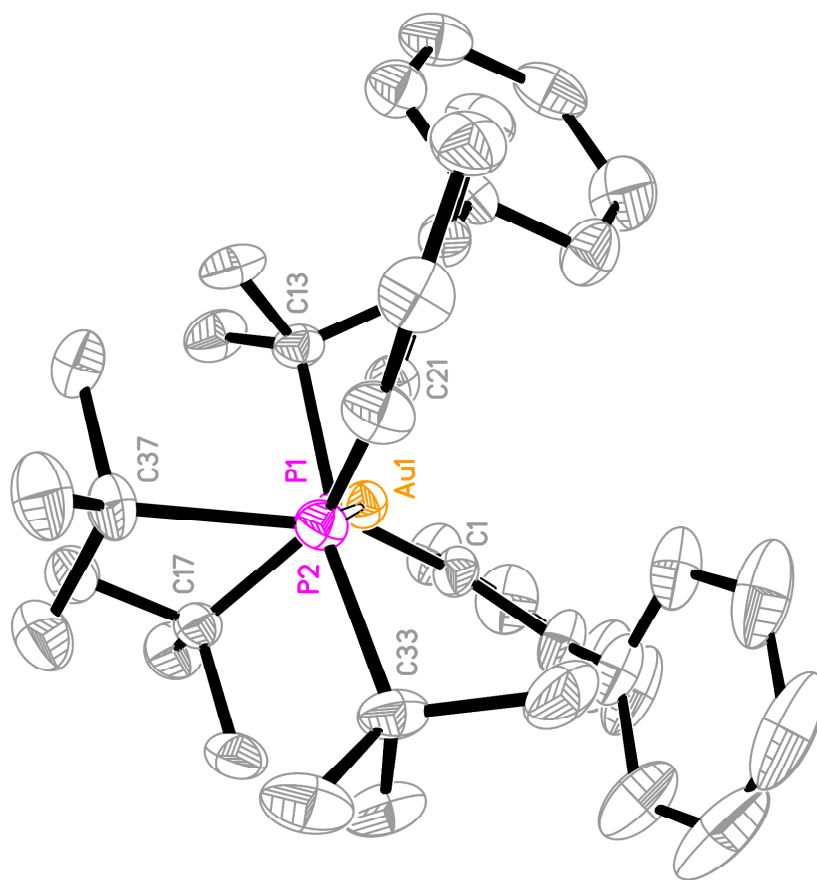

**Figure 5.** shows a perspective drawing of the anion and solvent molecule of crystallization present in the solid state structure of  $[\text{Au}(\text{P}(\text{C}_4\text{H}_9)_2(\text{C}_{12}\text{H}_9))_2](\text{SbF}_6) \cdot \text{CH}_2\text{Cl}_2$ . Nonhydrogen atoms are represented by 50% probability ellipsoids. Hydrogen atoms are represented by arbitrarily-small spheres.

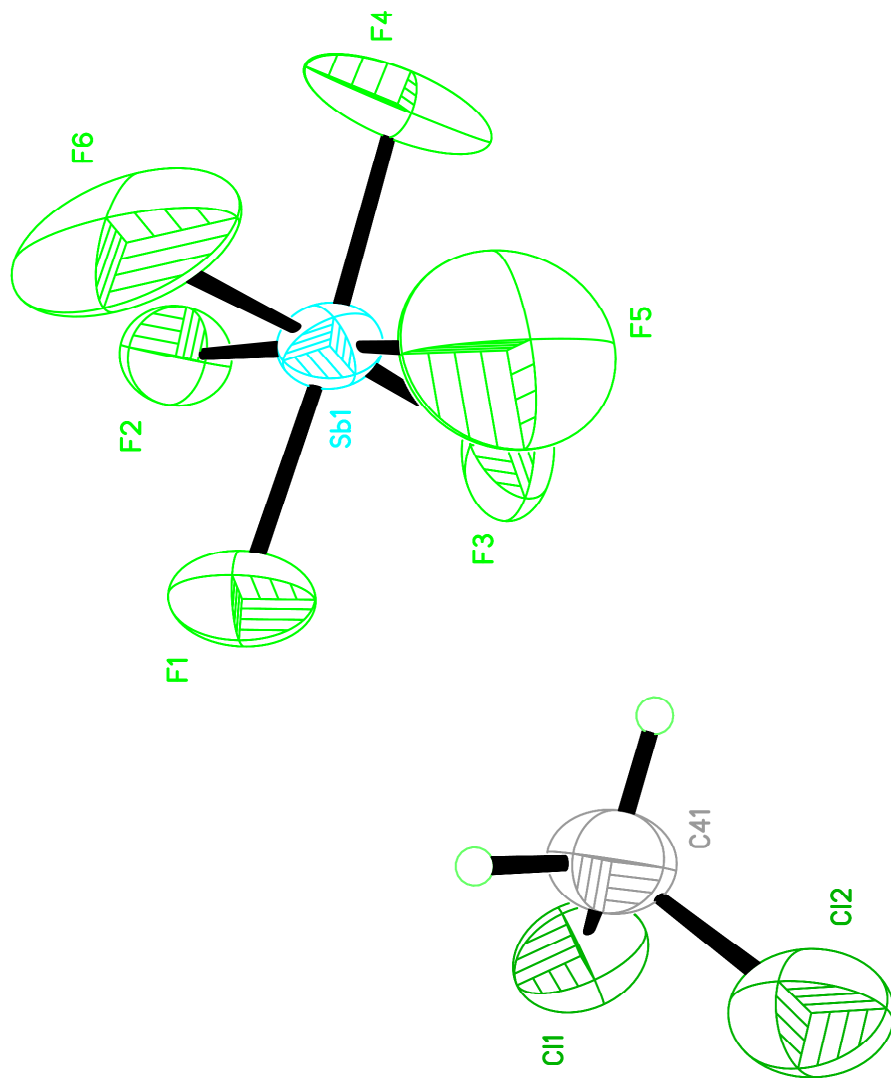

**Figure 6.** shows a projection of the unit cell when viewed down the  $\vec{b}$  axis in crystalline  $[\text{Au}(\text{P}(\text{C}_4\text{H}_9)_2(\text{C}_{12}\text{H}_9))_2](\text{SbF}_6) \cdot \text{CH}_2\text{Cl}_2$  with atoms represented as in Figure 1. Hydrogen atoms have been omitted for purposes of clarity.

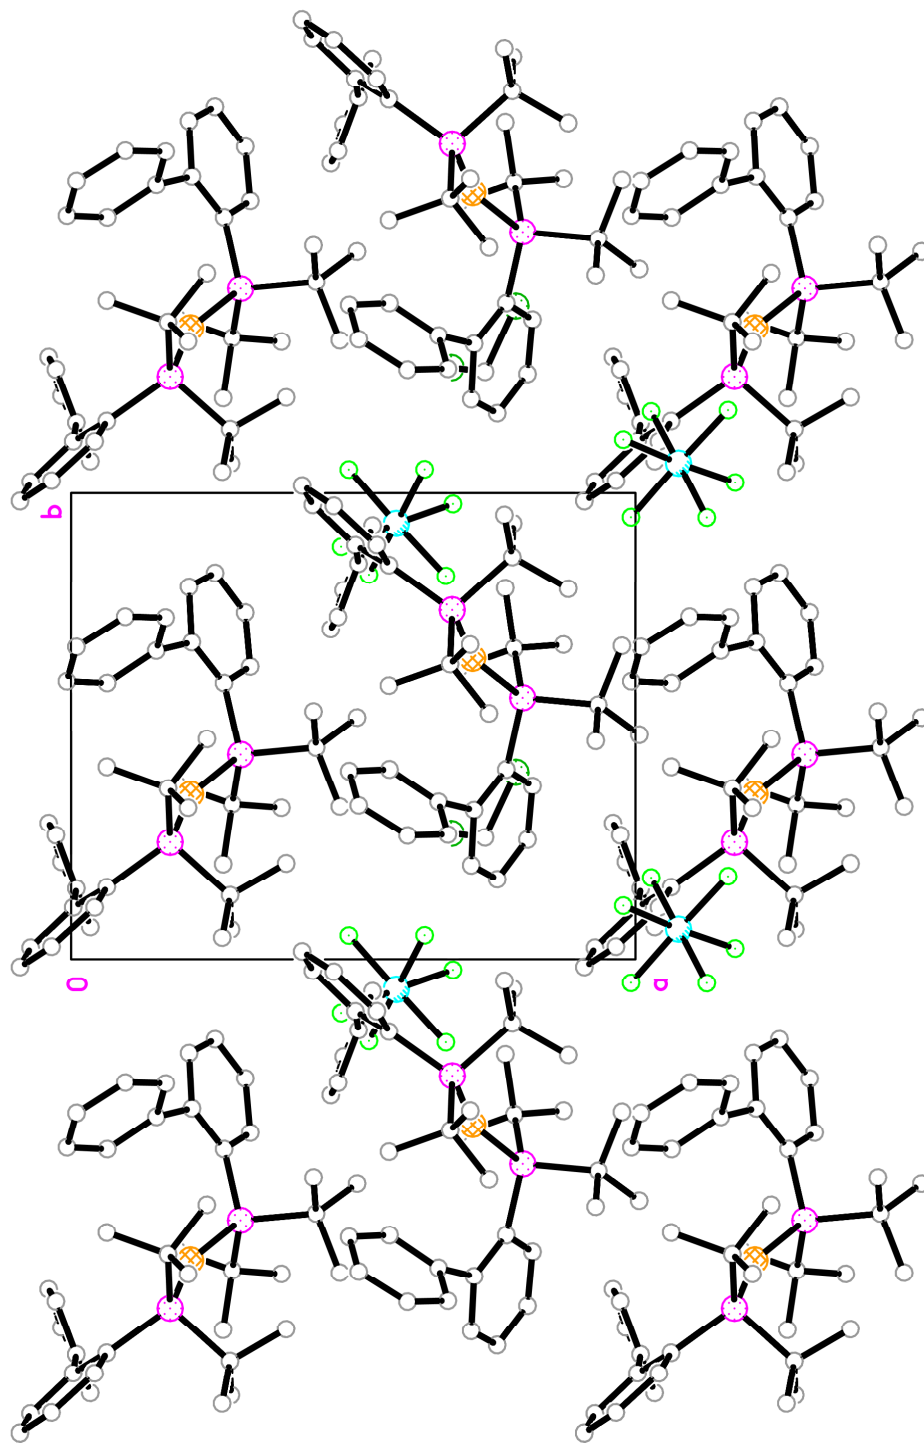



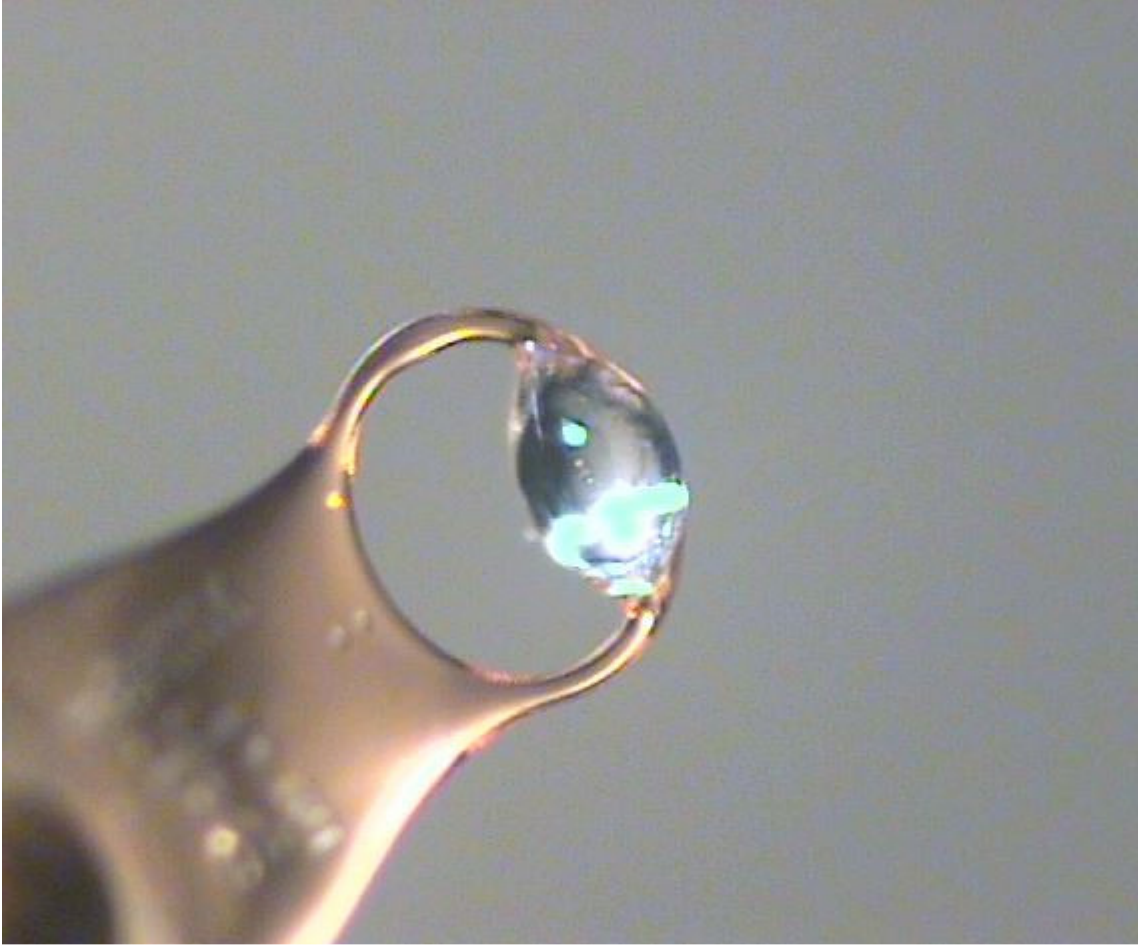

Data Crystal
